# Supplementary material for: GABPA-activated TGFBR2 transcription inhibits aggressiveness but is epigenetically erased by oncometabolites in renal cell carcinoma
Source: Springer Nature journal article supplement (doi:10.1186/s13046-022-02382-6), 2022-05-12
Supplement: MOESM1 [file 20396660]

**Table S1. Characteristics of 31 ccRCC patients with matched tumor and non-tumorous tissues**

| Variable                               | N          |
|----------------------------------------|------------|
| Age, mean (SEM <sup>a</sup> )          | 59.7 (2.2) |
| Sex, <i>n</i> (%)                      |            |
| Male                                   | 21 (67.7)  |
| Female                                 | 10 (32.3)  |
| Grade, <i>n</i> (%)                    |            |
| Low                                    | 16 (51.6)  |
| High                                   | 14 (45.2)  |
| Unknown                                | 1(3.2)     |
| AJCC stage <sup>b</sup> , <i>n</i> (%) |            |
| I                                      | 17 (54.8)  |
| II                                     | 4 (12.9)   |
| III                                    | 7 (22.6)   |
| IV                                     | 3 (9.7)    |
| T, <i>n</i> (%)                        |            |
| <T2                                    | 17 (54.8)  |
| ≥T2                                    | 14 (45.2)  |
| Lymph node metastasis, <i>n</i> (%)    |            |
| Positive                               | 1 (3.2)    |
| Negative                               | 14 (45.2)  |
| Unknown                                | 16 (51.6)  |

<sup>a</sup>SEM, standard error of mean.

<sup>b</sup>Tumor AJCC stages according to the American Joint Committee on Cancer (AJCC) 7th edition.
