# Supplementary material for: GABPA-activated TGFBR2 transcription inhibits aggressiveness but is epigenetically erased by oncometabolites in renal cell carcinoma
Source: Springer Nature journal article supplement (doi:10.1186/s13046-022-02382-6), 2022-05-12
Supplement: MOESM2 [file 20396660]

**Table S2. Clinic-pathological data 90 ccRCC patients contained in tumor tissue array**

|                                        | Micro-Tissue Array        |                              |
|----------------------------------------|---------------------------|------------------------------|
|                                        | Alive<br>( <i>n</i> = 59) | Deceased<br>( <i>n</i> = 31) |
| Age, mean (SEM <sup>a</sup> )          | 56.0 (1.4)                | 65.0 (1.9)                   |
| Sex, <i>n</i> (%)                      |                           |                              |
| Male                                   | 40 (69.0)                 | 19 (61.3)                    |
| Female                                 | 18 (31.0)                 | 12 (38.7)                    |
| Grade, <i>n</i> (%)                    |                           |                              |
| Low                                    | 51 (86.4)                 | 12 (38.7)                    |
| High                                   | 8 (13.6)                  | 19 (61.3)                    |
| AJCC stage <sup>b</sup> , <i>n</i> (%) |                           |                              |
| I                                      | 43 (72.9)                 | 12 (38.7)                    |
| II                                     | 12 (20.3)                 | 12 (38.7)                    |
| III                                    | 2 (3.4)                   | 4 (12.9)                     |
| IV                                     |                           | 2 (6.5)                      |
| Unknown                                | 2 (3.4)                   | 1 (3.2)                      |
| T, <i>n</i> (%)                        |                           |                              |
| <T2                                    | 45 (76.3)                 | 12 (38.7)                    |
| ≥T2                                    | 14 (23.7)                 | 19 (61.3)                    |
| Lymph node metastasis, <i>n</i> (%)    |                           |                              |
| Positive                               |                           | 2 (6.5)                      |
| Negative                               | 57 (96.6)                 | 28 (90.3)                    |
| Unknown                                | 2 (3.4)                   | 1 (3.2)                      |
| Tumor size (cm), <i>n</i> (%)          |                           |                              |
| < 5                                    | 34 (57.6)                 | 9 (29.0)                     |
| ≥ 5                                    | 25 (42.4)                 | 22 (71.0)                    |

<sup>a</sup>SEM, standard error of mean.

<sup>b</sup>Tumor AJCC stages according to the American Joint Committee on Cancer (AJCC) 7th edition.
