# Supplementary material for: GABPA-activated TGFBR2 transcription inhibits aggressiveness but is epigenetically erased by oncometabolites in renal cell carcinoma
Source: Springer Nature journal article supplement (doi:10.1186/s13046-022-02382-6), 2022-05-12
Supplement: MOESM3 [file 20396660]

**Table S3. Clinic-pathological characteristics of the TCGA cohort of 537 ccRCC patients**

|                                        | TCGA-KIRC                  |                               |
|----------------------------------------|----------------------------|-------------------------------|
|                                        | Alive<br>( <i>n</i> = 360) | Deceased<br>( <i>n</i> = 177) |
| Age, mean (SEM <sup>a</sup> )          | 58.8 (0.6)                 | 64.2 (0.9)                    |
| Sex, <i>n</i> (%)                      |                            |                               |
| Male                                   | 234 (65.0)                 | 112 (63.3)                    |
| Female                                 | 126 (35.0)                 | 65 (36.7)                     |
| Grade, <i>n</i> (%)                    |                            |                               |
| Low                                    | 199 (55.3)                 | 45 (25.4)                     |
| High                                   | 154 (42.8)                 | 131 (74.0)                    |
| Unknown                                | 7 (1.9)                    | 1 (0.6)                       |
| AJCC stage <sup>b</sup> , <i>n</i> (%) |                            |                               |
| I                                      | 224 (62.2)                 | 45 (25.4)                     |
| II                                     | 44 (12.2)                  | 13 (7.3)                      |
| III                                    | 74 (20.6)                  | 51 (28.8)                     |
| IV                                     | 16 (4.4)                   | 67 (37.9)                     |
| Unknown                                | 2 (0.6)                    | 1 (0.6)                       |
| T, <i>n</i> (%)                        |                            |                               |
| <T2                                    | 225 (62.5)                 | 50 (28.2)                     |
| ≥T2                                    | 135 (37.5)                 | 127 (71.8)                    |
| Lymph node metastasis, <i>n</i> (%)    |                            |                               |
| Positive                               | 5 (1.4)                    | 12 (6.8)                      |
| Negative                               | 155 (43.1)                 | 85 (48.0)                     |
| Unknown                                | 200 (55.5)                 | 80 (45.2)                     |

<sup>a</sup>SEM, standard error of mean.

<sup>b</sup>Tumor AJCC stages according to the American Joint Committee on Cancer (AJCC) 7th edition.
