# Supplementary material for: GABPA-activated TGFBR2 transcription inhibits aggressiveness but is epigenetically erased by oncometabolites in renal cell carcinoma
Source: Springer Nature journal article supplement (doi:10.1186/s13046-022-02382-6), 2022-05-12
Supplement: MOESM4 [file 20396660]

**Table S4. Sequences of primers, siRNAs and plasmids used in the study.****siRNA**

|             |  |                                  |
|-------------|--|----------------------------------|
| GABPA (G1)  |  | 5'-GGAGCUGAUAGAAAUUGAGAUUGAU-3'  |
| GABPA (G2)  |  | 5'-GCAGAGUGCACAGAAGAAAGCAUUG-3'  |
| TGFBR2 (1)  |  | 5'-CUGACUUGUUGCUAGUCAUUAUUUCA-3' |
| TGFBR2 (2)  |  | 5'-CUCUGAUGAGUGCAAUGACAACATC-3'  |
| L-2HGDH (1) |  | 5'-GGUGCAACAGUGAAGUAUCUUCAAA     |
| L-2HGDH (2) |  | 5'-ACAAGAAUGUACUAAUUGCAUUCTT-3'  |
| MDH2 (1)    |  | 5'-CUGAAGCGUGACGCUUUCaucagTA-3'  |
| MDH2 (2)    |  | 5'-GAAGCCAUGAUCUGCGUCAUUGCCA-3'  |
| LDHB (1)    |  | 5'-AAGUACAGUCCUGAUUGCAUCAUAA-3'  |
| LDHB (2)    |  | 5'-UAUGAAGUCAUCAAGCUAAAAGGAT-3'  |

**QRT-PCR**

|                |         |                                          |
|----------------|---------|------------------------------------------|
| <i>GABPA</i>   | Forward | 5'- AAGAACGCCTTGGGATACCCT-3'             |
|                | Reverse | 5'- GTGAGGTCTATATCGGTCATGCT-3'           |
| <i>TGFBR2</i>  | Forward | 5'-ctg ccc atc cac tga gac at-3'         |
|                | Reverse | 5'-ctg cag ttg ctc atg cag gat-3'        |
| <i>TERT</i>    | Forward | 5'-CGGAAGAGTGTCTGGAGCAA-3'               |
|                | Reverse | 5'-GGATGAAGCGGAGTCTGGA-3'                |
| <i>L-2HGDH</i> | Forward | 5'-caa gaa gca ggt ggc tct gtc t-3'      |
|                | Reverse | 5'-gca cat gtc aca aca tac tga ca-3'     |
| <i>MDH2</i>    | Forward | 5'-ctg agc cac atc gag acc aa-3'         |
|                | Reverse | 5'-ccg gaa taa cta cca cat cac a-3'      |
| <i>LDHB</i>    | Forward | 5'-gga tct gca gca tgg gag ct -3'        |
|                | Reverse | 5'-cgg act cct gca gtt acc act-3'        |
| <i>cMYC</i>    | Forward | 5'-TACCCTCTCAACGACAGCAGCTCGCCCAAGTCCT-3' |
|                | Reverse | 5'-TCTTGACATTCTCCTCGGTGTCCGAGGACCT-3'    |
| <i>CCND1</i>   | Forward | 5'-GCC GAG AAG CTG TGC ATC T-3'          |
|                | Reverse | 5'-CTC CTC CGC CTC TGG CAT T-3'          |
| <i>CDKN1A</i>  | Forward | 5'-GCGACTGTGATGCGCTAAT-3'                |
|                | Reverse | 5'-TAGGGCTTCCTCTTGGAGAA-3'               |
| <i>ZEB1</i>    | Forward | 5'-AGCAGTGAAAGAGAAGGGAATGC-3'            |
|                | Reverse | 5'-GGTCCTCTTCAGGTGCCTCAG-3'              |

|                 |         |                                     |
|-----------------|---------|-------------------------------------|
| CDH1            | Forward | 5'-TTCCTCCCAATACATCTCCC-3'          |
|                 | Reverse | 5'-TTGATTTTGTAGTCACCCACC-3'         |
| <i>Vimentin</i> | Forward | 5'-CTC TTC CAA ACT TTT CCT CCC-3'   |
|                 | Reverse | 5'-AGT TTC GTT GAT AAC CTG TCC-3'   |
| OCT.            | Forward | 5'-GGG TGG AGG CTG ACA ACA-3'       |
|                 | Reverse | 5'-CGG GCA CTG CAG GAA CAA AT-3'    |
| CD44            | Forward | 5'-GGG GTC TAC ATC CTC ACA TCC A-3' |
|                 | Reverse | 5'-CGG GTG CCA TCA CGG TTA ACA-3'   |
| NANOG           | Forward | 5'-cacggagactgtctctctct-3'          |
|                 | Reverse | 5'-ctgggtggaagagaacacagt-3'         |
| $\beta$ 2-M     | Forward | 5'-GAATTGCTATGTGTCTGGGT-3'          |
|                 | Reverse | 5'-CATCTCAAACCTCCATGATG-3'          |

#### ChIP assay

|                           |         |                                   |
|---------------------------|---------|-----------------------------------|
| TGFBR2 promoter region 1  | Forward | 5'-cct gga gac cct ggc aca a-3'   |
|                           | Reverse | 5'-gcc ctc tgg tca gta gat ct-3'  |
| TGFBR2 promoter region 2  | Forward | 5'-ccc acc act atc act tcg tga-3' |
|                           | Reverse | 5'-cct gga tag agc gtc cca ttt-3' |
| GABPA promoter cg08521263 | Forward | 5'-CAG AGG GTC TTC ATT TCT TCA-3' |
|                           | Reverse | 5'-GGG TAA GGT CTC CAC TGG GA-3'  |

#### Plasmids

|                                     |                                               |
|-------------------------------------|-----------------------------------------------|
| pGL3-TGFBR2-Promoter reporters (wt) | Shanghai Integrated Biotech Solutions Co.,Ltd |
| pGL3-TGFBR2-Promoter reporters (mt) | Shanghai Integrated Biotech Solutions Co.,Ltd |
| GABPA expression plasmid            | Shanghai Integrated Biotech Solutions Co.,Ltd |
| L-2HGDH expression plasmid          | Origene                                       |
| TGFBR2 expression plasmid           | Addgene                                       |

---
