# Supplementary material for: GABPA-activated TGFBR2 transcription inhibits aggressiveness but is epigenetically erased by oncometabolites in renal cell carcinoma
Source: Springer Nature journal article supplement (doi:10.1186/s13046-022-02382-6), 2022-05-12
Supplement: MOESM5 [file 20396660]

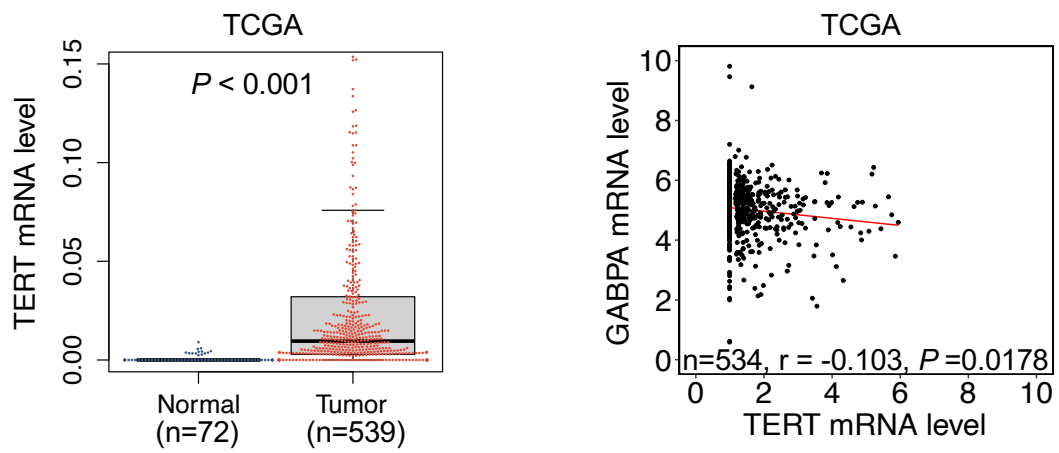

**Figure S1. The inverse correlation between TERT and GABPA expression in primary ccRCC tumors from the TCGA cohort.** mRNA was expressed as RSEM (RNA-Seq by Expectation Maximization).
