# Supplementary material for: GABPA-activated TGFBR2 transcription inhibits aggressiveness but is epigenetically erased by oncometabolites in renal cell carcinoma
Source: Springer Nature journal article supplement (doi:10.1186/s13046-022-02382-6), 2022-05-12
Supplement: MOESM6 [file 20396660]

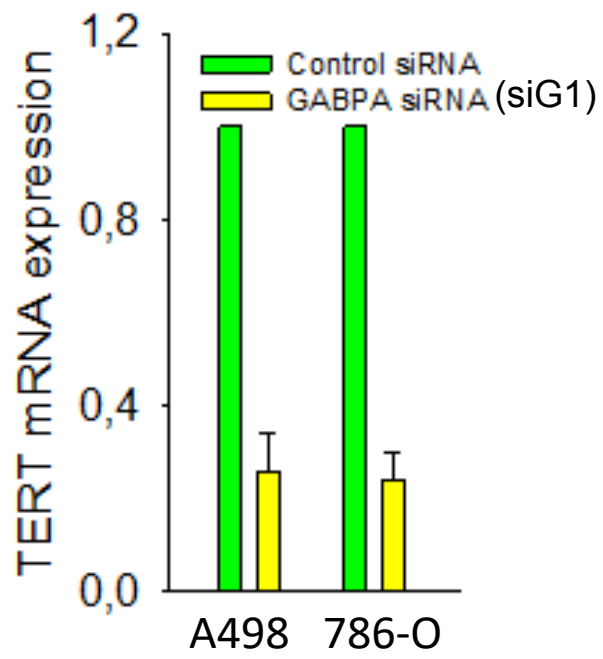

**Figure S2. Downregulation of TERT expression in GABPA-depleted A498 and 786-O cells.** A498 cells carry a wt TERT promoter while 786-O cells have a mutant TERT promoter. Cells were transfected with GABPA siRNA (siG1) and TERT mRNA was assessed using qPCR.
