# Supplementary material for: GABPA-activated TGFBR2 transcription inhibits aggressiveness but is epigenetically erased by oncometabolites in renal cell carcinoma
Source: Springer Nature journal article supplement (doi:10.1186/s13046-022-02382-6), 2022-05-12
Supplement: MOESM7 [file 20396660]

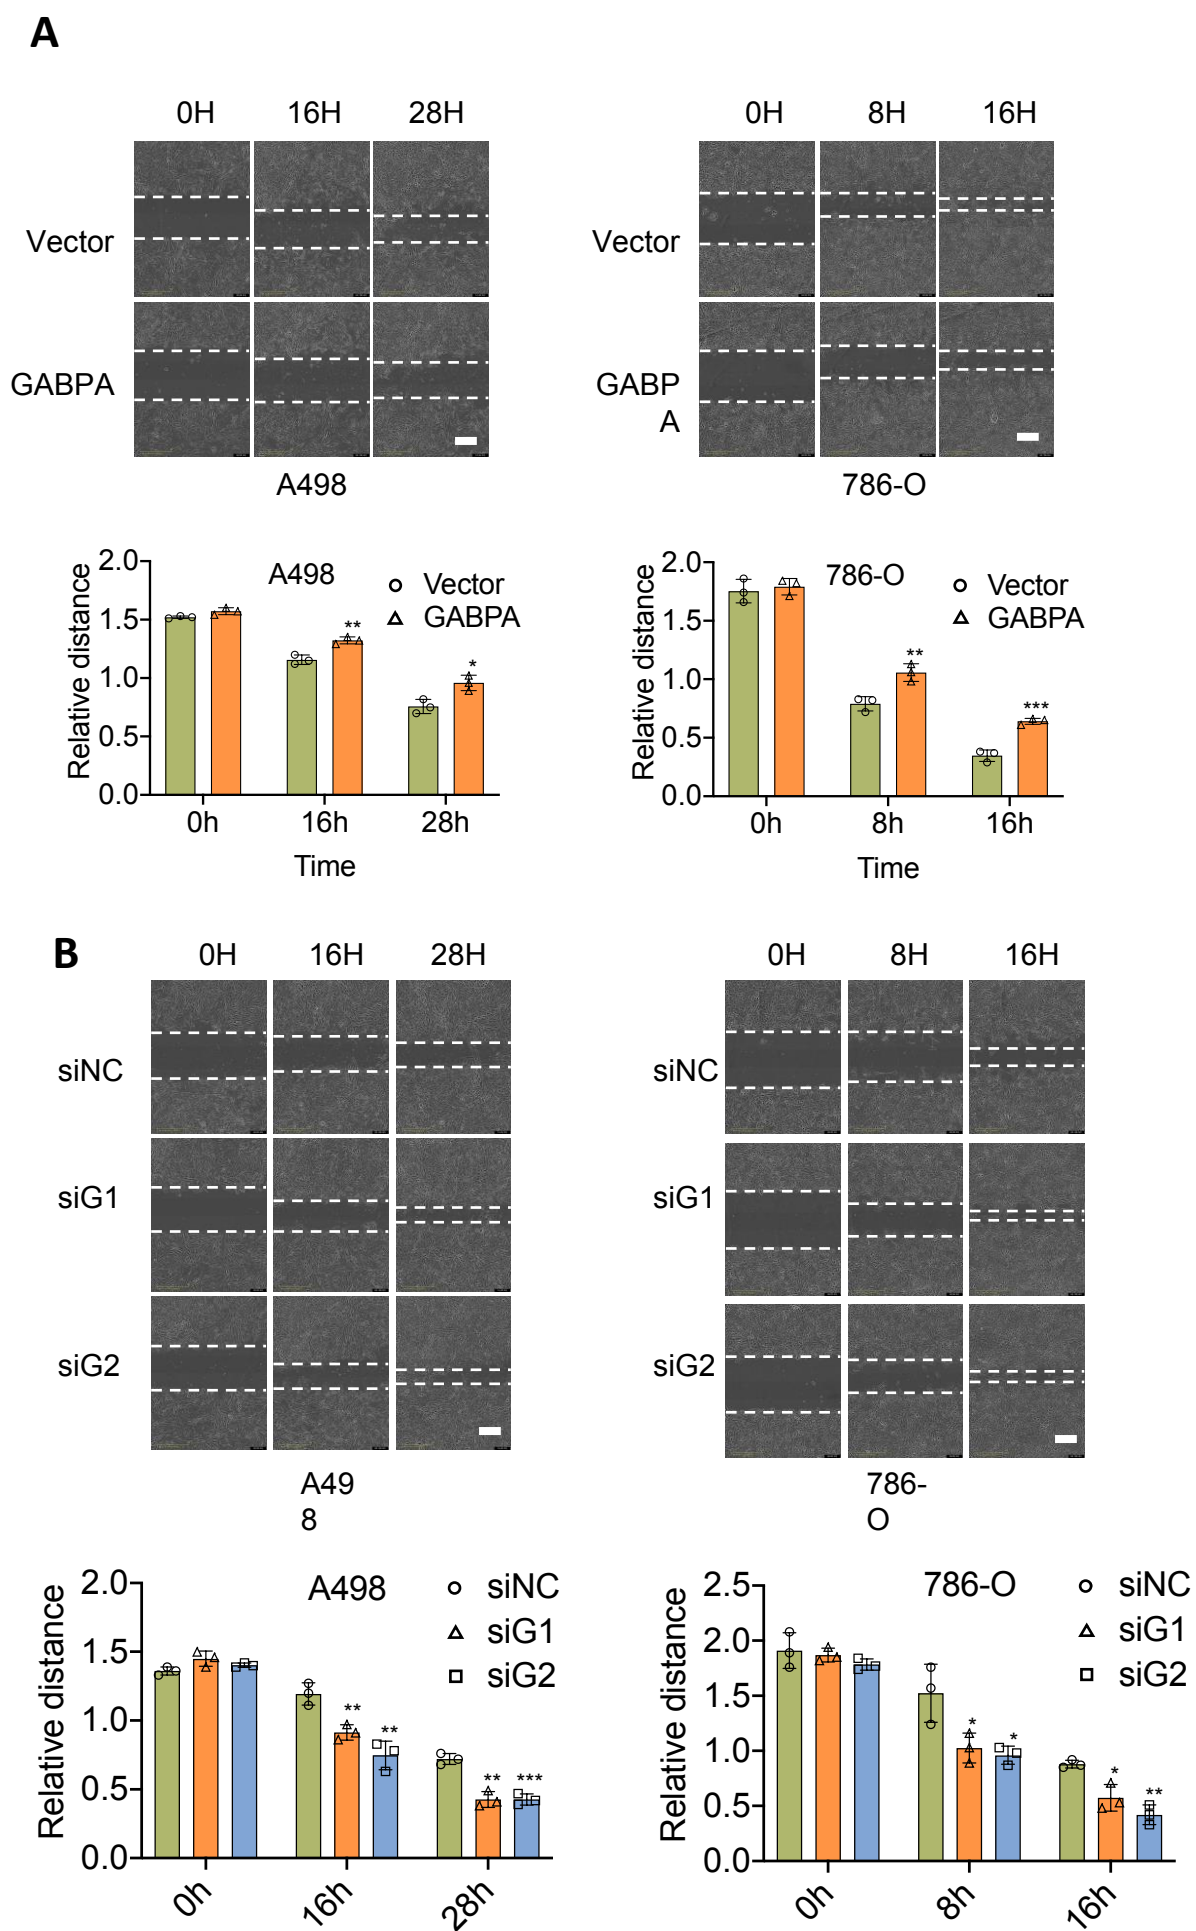

**Figure S3. GABPA overexpression inhibits while its depletion promotes the migration of ccRCC-derived cells.** (A) A498 and 786-O cells were transfected with control and GABPA expression vectors, respectively, and wound width was assessed at different time points. (B) A498 and 786-O cells were transfected with control and GABPA siRNAs, respectively, and wound width was assessed as above. Scale bars: 100  $\mu$ M. \*, \*\* and \*\*\* denote  $P < 0.05$ , 0.01 and 0.001, respectively. Three independent experiments were performed.
