# Supplementary material for: GABPA-activated TGFBR2 transcription inhibits aggressiveness but is epigenetically erased by oncometabolites in renal cell carcinoma
Source: Springer Nature journal article supplement (doi:10.1186/s13046-022-02382-6), 2022-05-12
Supplement: MOESM8 [file 20396660]

**A**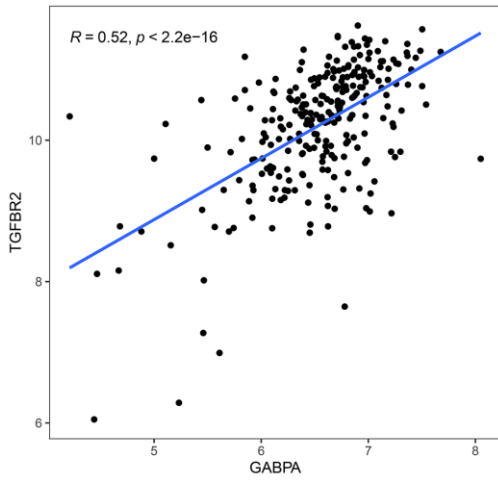**B**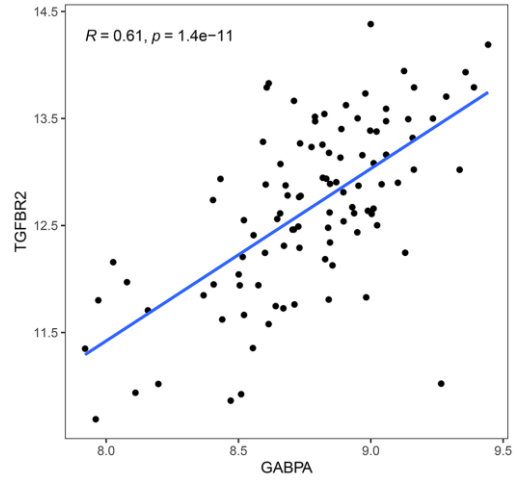

**Figure S4. The correlation between GABPA and TGFB2 mRNA expression in ccRCC tumors from GSE73731 and E-MTAB-1980 cohorts.** GSE73731 cohort contains 265 ccRCC tumors analyzed using the Affymetrix Microarrays (A), while RNA sequencing was performed on 101 ccRCC tumors in E-MTAB-1980 (B). For RNA seq, mRNA levels were expressed as Log2(RSEM) (RNA-Seq by Expectation-Maximization). mRNA levels assessed using Affymetrix were expressed as log2(probe-set value).
