# Supplementary material for: GABPA-activated TGFBR2 transcription inhibits aggressiveness but is epigenetically erased by oncometabolites in renal cell carcinoma
Source: Springer Nature journal article supplement (doi:10.1186/s13046-022-02382-6), 2022-05-12
Supplement: MOESM9 [file 20396660]

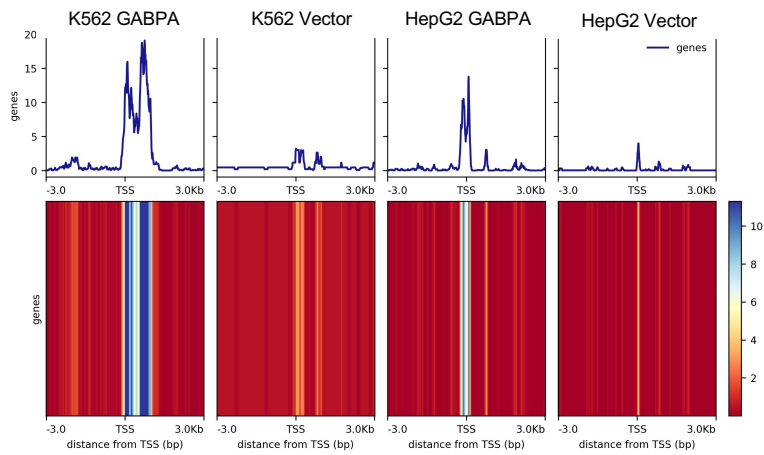

**Figure S5. ChIP-seq shows strong GABPA signals on the TGFBR2 promoter in leukemic K562 and liver cancer HepG2 cells. GABPA ChIP-seq results were obtained from GEO dataset (GSM2527661 and GSM2527662) and K562 cells (GSM2825959 and GSM2825960).**
