# Supplementary material for: GABPA-activated TGFBR2 transcription inhibits aggressiveness but is epigenetically erased by oncometabolites in renal cell carcinoma
Source: Springer Nature journal article supplement (doi:10.1186/s13046-022-02382-6), 2022-05-12
Supplement: MOESM10 [file 20396660]

# siGABPA\_VS\_siNC\_kegg\_up\_down

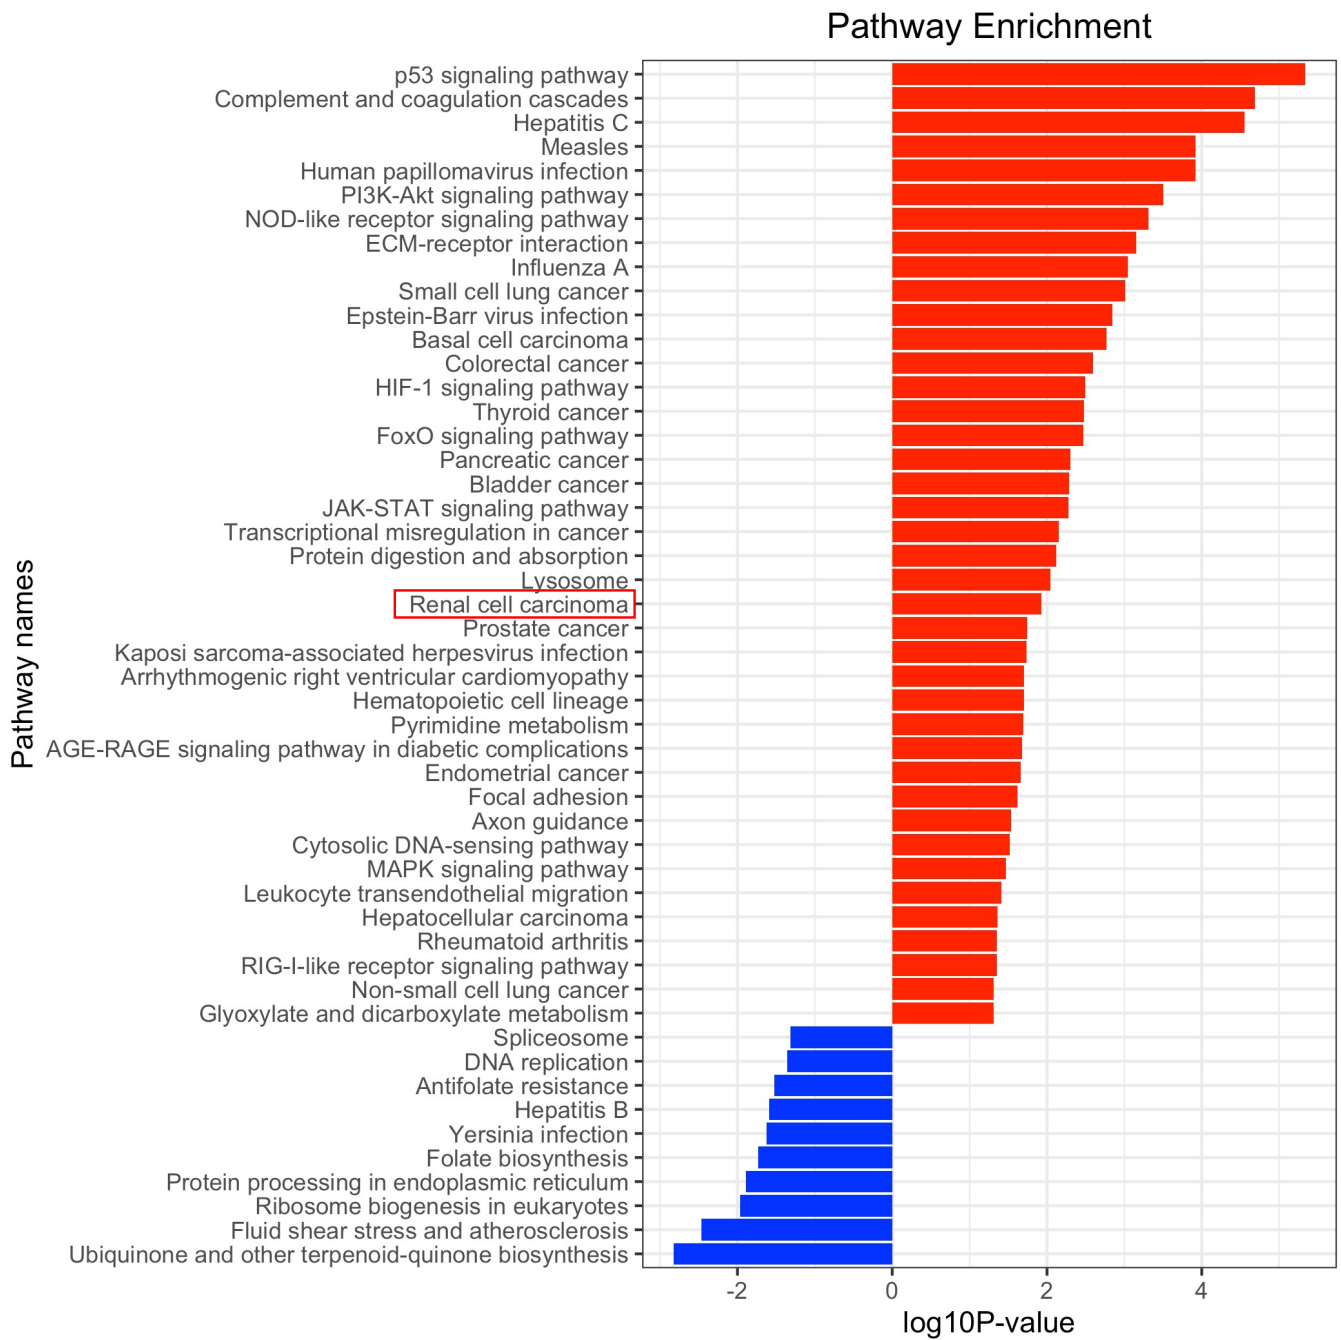

**Figure S6. KEGG analyses of RNA seq data from GABPA-depleted 786-O cells show the enrichments of RCC pathways (Marked in RED)**
