# Supplementary material for: GABPA-activated TGFBR2 transcription inhibits aggressiveness but is epigenetically erased by oncometabolites in renal cell carcinoma
Source: Springer Nature journal article supplement (doi:10.1186/s13046-022-02382-6), 2022-05-12
Supplement: MOESM11 [file 20396660]

**A**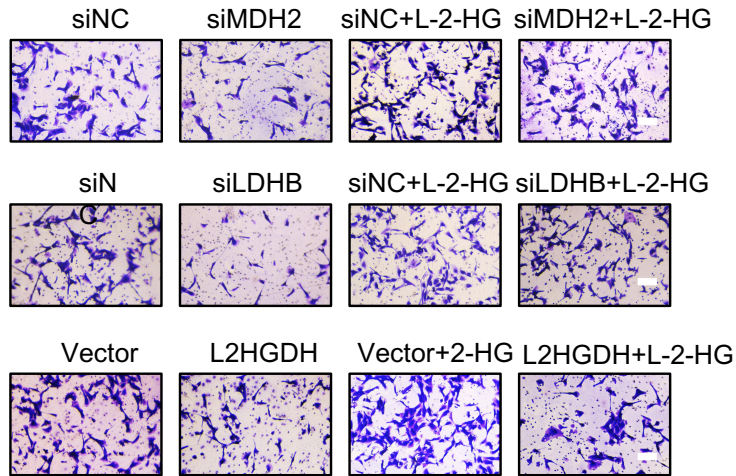**B**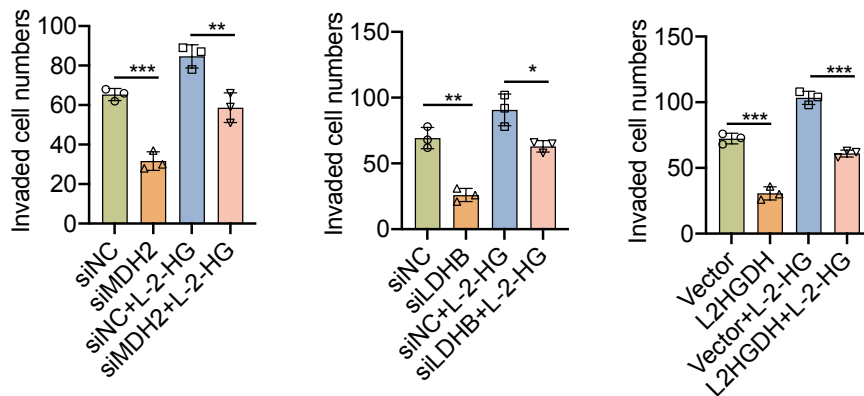**C**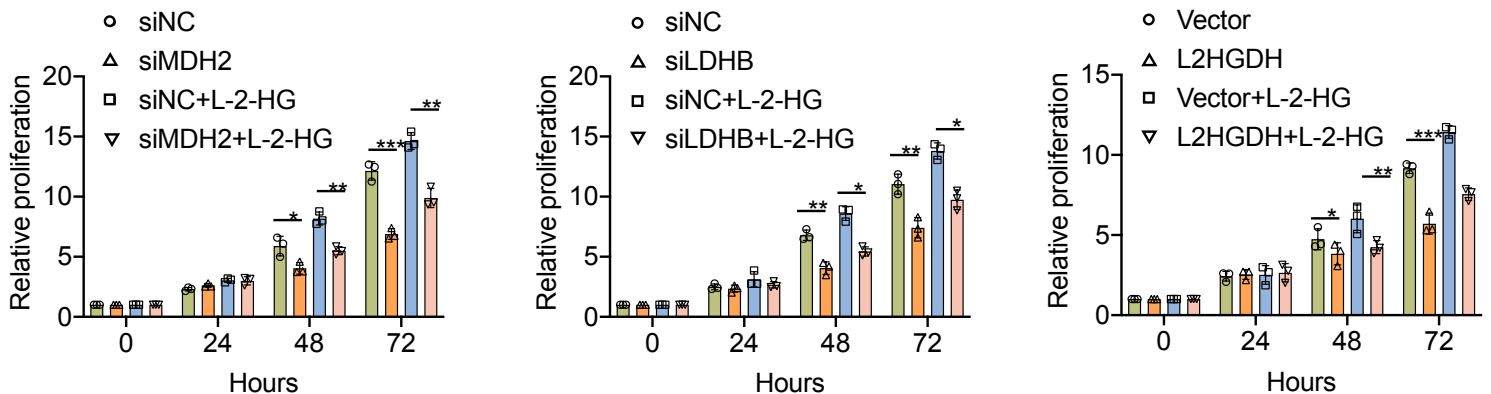

**Figure S7. L-2-HG promotes while L-2HGDH over-expression or MDH2 and LDHB depletion inhibit the proliferation and invasion of ccRCC-derived cells.** (A) 786-O cells were transfected with MDH2 siRNA(top), LDHB siRNA (Middle) and L2HGDH expression vector (Bottom), respectively, with and without L-2-HG. Invasion was then assessed 48 hours post-transfection using matrigel-coated invasion assays (B). (C) 786-O cells treated above were analyzed for their proliferation using IncuCyte S3 Live-Cell Analysis System. Scale bars: 100  $\mu$ m. \*, \*\* and \*\*\* denote  $P < 0.05$ , 0.01 and 0.001, respectively. Three independent experiments were performed.
