# Supplementary material for: GABPA-activated TGFBR2 transcription inhibits aggressiveness but is epigenetically erased by oncometabolites in renal cell carcinoma
Source: Springer Nature journal article supplement (doi:10.1186/s13046-022-02382-6), 2022-05-12
Supplement: MOESM12 [file 20396660]

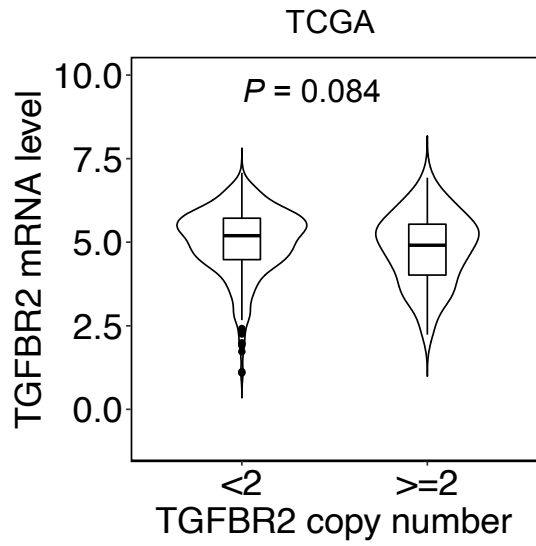

**Figure S8. The lack of correlation between TGFBR2 mRNA expression and its gene copies.** The TCGA cohort of ccRCC patients were analyzed for TGFBR2 mRNA levels and copy numbers in their tumors . The tumors were divided into two groups with the TGFBR2 copies <2 and  $\geq 2$ . TGFBR2 mRNA was expressed as RSEM (RNA-Seq by Expectation Maximization).
